# Supplementary material
Source: Research Square preprint supplement (doi:10.21203/rs.3.rs-9361391/v1)
Supplement: Supplementary file 1 [file 7cafdc4b64fa9d7aa5825bcc.xlsx]

## Sheet: Sheet1
Supplemental Table 2. Multivariate statistical analysis of beta diversity comparisons for Jaccard and Bray-Curtis distances amongst metadata of fecal EED pool samples
Distance	metadata	metric	groups	n	P	test_statistic
Jaccard	mastermix	PERMANOVA	4	24	0.001	1.80375
	mastermix	PERMDISP	4	24	0.32	1.14682
	longplex_rxn	PERMANOVA	4	24	0.001	2.08489
	longplex_rxn	PERMDISP	4	24	0.006	6.43677
Bray-Curtis	mastermix	PERMANOVA	4	24	0.001	4.19741
	mastermix	PERMDISP	4	24	0.711	0.401191
	longplex_rxn	PERMANOVA	4	24	0.001	6.28076
	longplex_rxn	PERMDISP	4	24	0.008	6.22929
